# Supplementary material for: Earth science for all? The economic barrier to European geoscience conferences
Source: Copernicus journal article supplement (doi:10.5194/gc-7-245-2024), 2024-10-10
Supplement: Supplementary file 1 [file gc-7-245-2024-supplement.pdf]

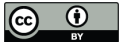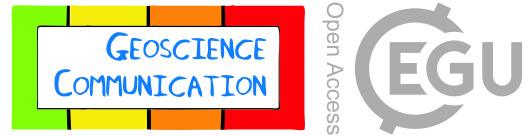

*Supplement of*

## **Earth science for all? The economic barrier to European geoscience conferences**

**Francyne Bochi do Amarante and Mauricio Barcelos Haag**

*Correspondence to:* Francyne Bochi do Amarante ([francyneb@gmail.com](mailto:francyneb@gmail.com))

The copyright of individual parts of the supplement might differ from the article licence.

1 **Supplementary data**

2

| Data                                                       | Source      | Link                                                                                                                        |
|------------------------------------------------------------|-------------|-----------------------------------------------------------------------------------------------------------------------------|
| Population                                                 | World Bank  | <a href="https://data.worldbank.org/indicator/SP.POP.TOTL">https://data.worldbank.org/indicator/SP.POP.TOTL</a>             |
| Gross National Income Per Capta (current international \$) | World Bank  | <a href="https://data.worldbank.org/indicator/NY.GNP.PCAP.PP.CD">https://data.worldbank.org/indicator/NY.GNP.PCAP.PP.CD</a> |
| EGU demographics                                           | EGU website | <a href="https://www.egu.eu/meetings/general-assembly/meetings/">https://www.egu.eu/meetings/general-assembly/meetings/</a> |
| Distance to conference site                                | Google Maps |                                                                                                                             |

3
